# Supplementary material
Source: ML conference proceedings conference paper supplement (https://openreview.net/forum?id=cok_34a1r3)

Cora Train Set

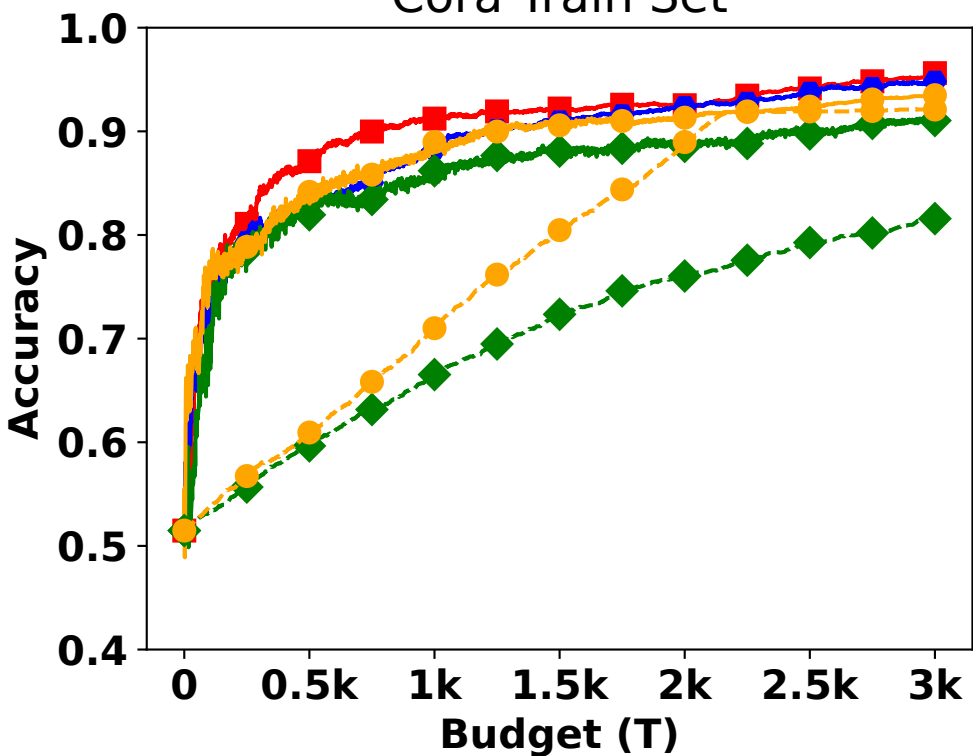

Citeseer Train Set

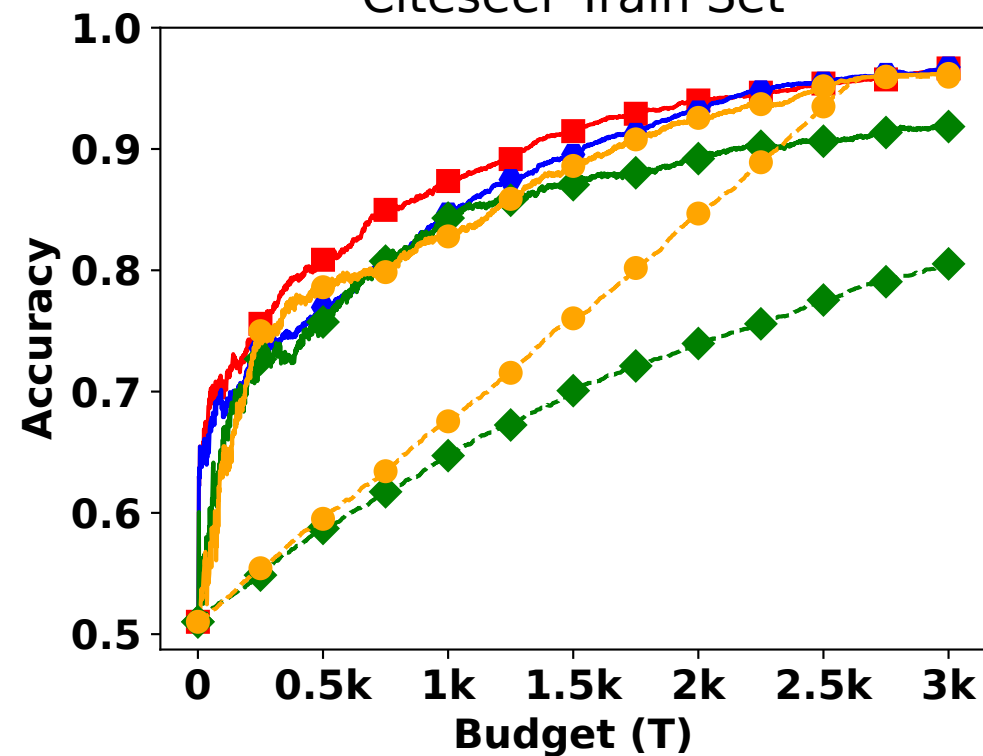

Pubmed Train Set

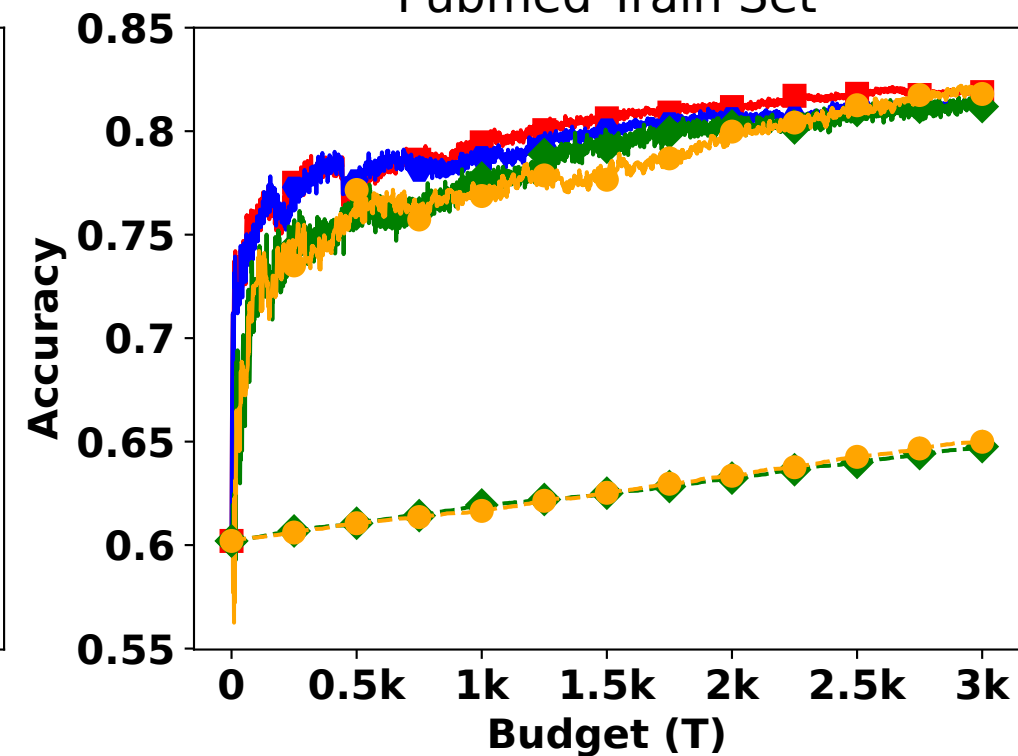

Cora Test Set

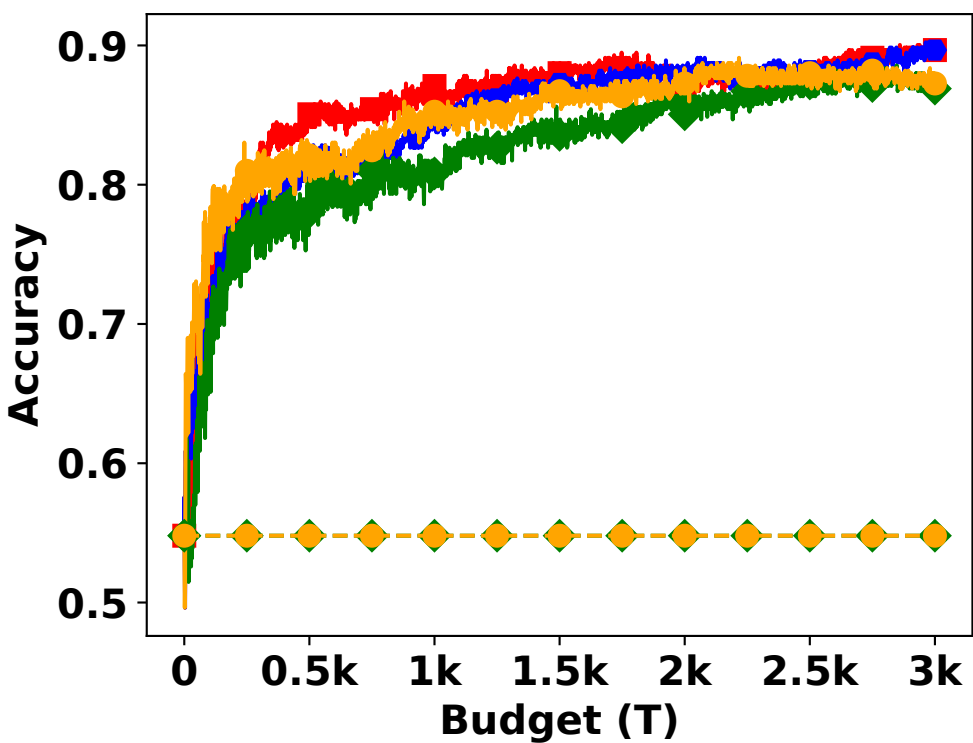

Citeseer Test Set

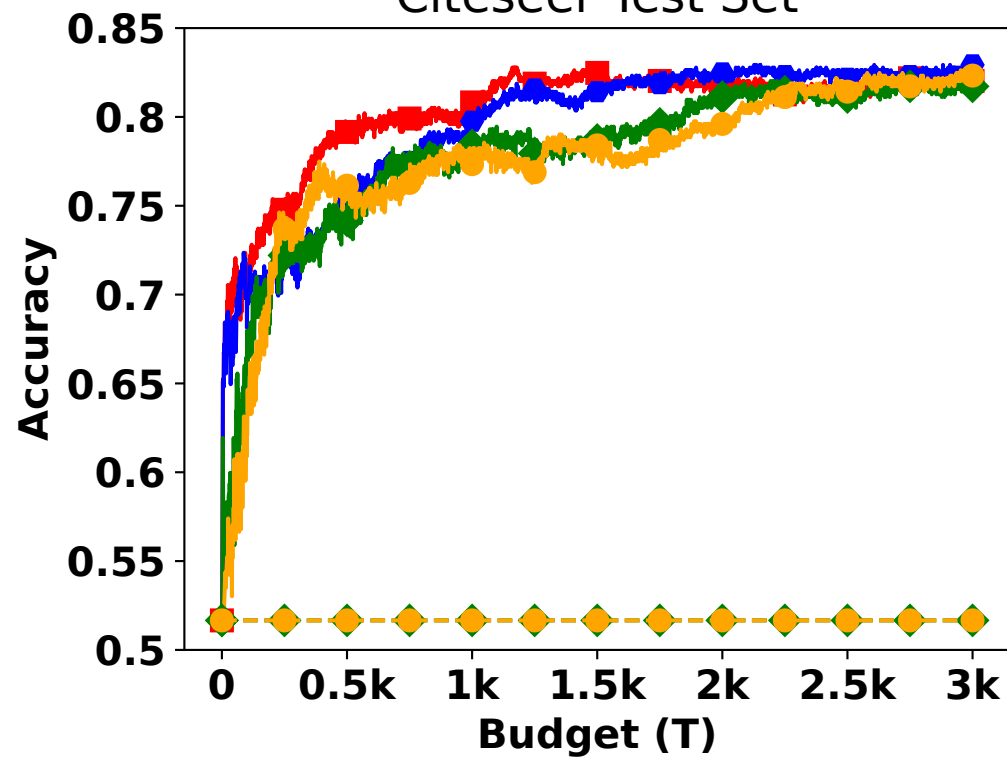

Pubmed Test Set

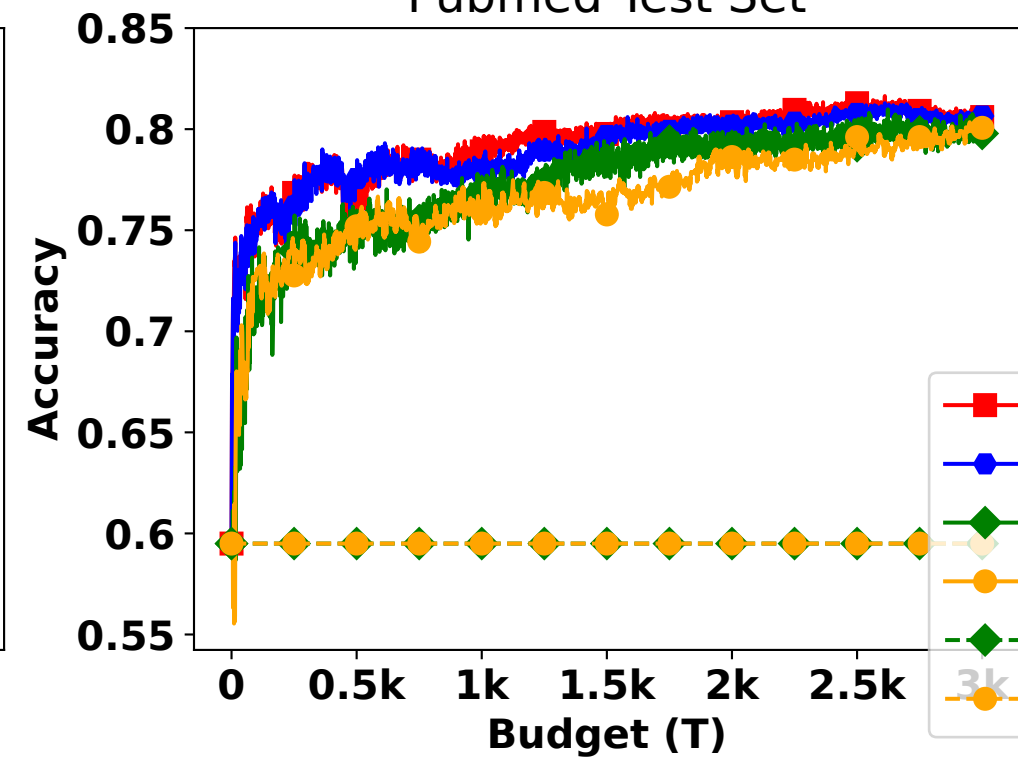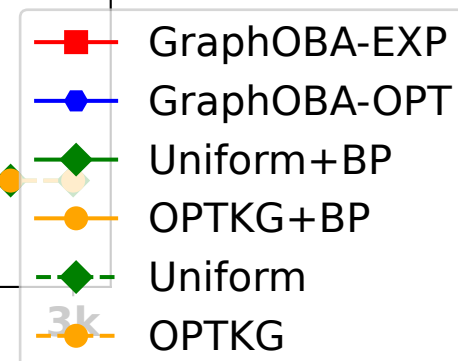

Supplement: supplementary_material [file attachment]
