# Supplementary material
Source: ML conference proceedings conference paper supplement (https://openreview.net/forum?id=cok_34a1r3)

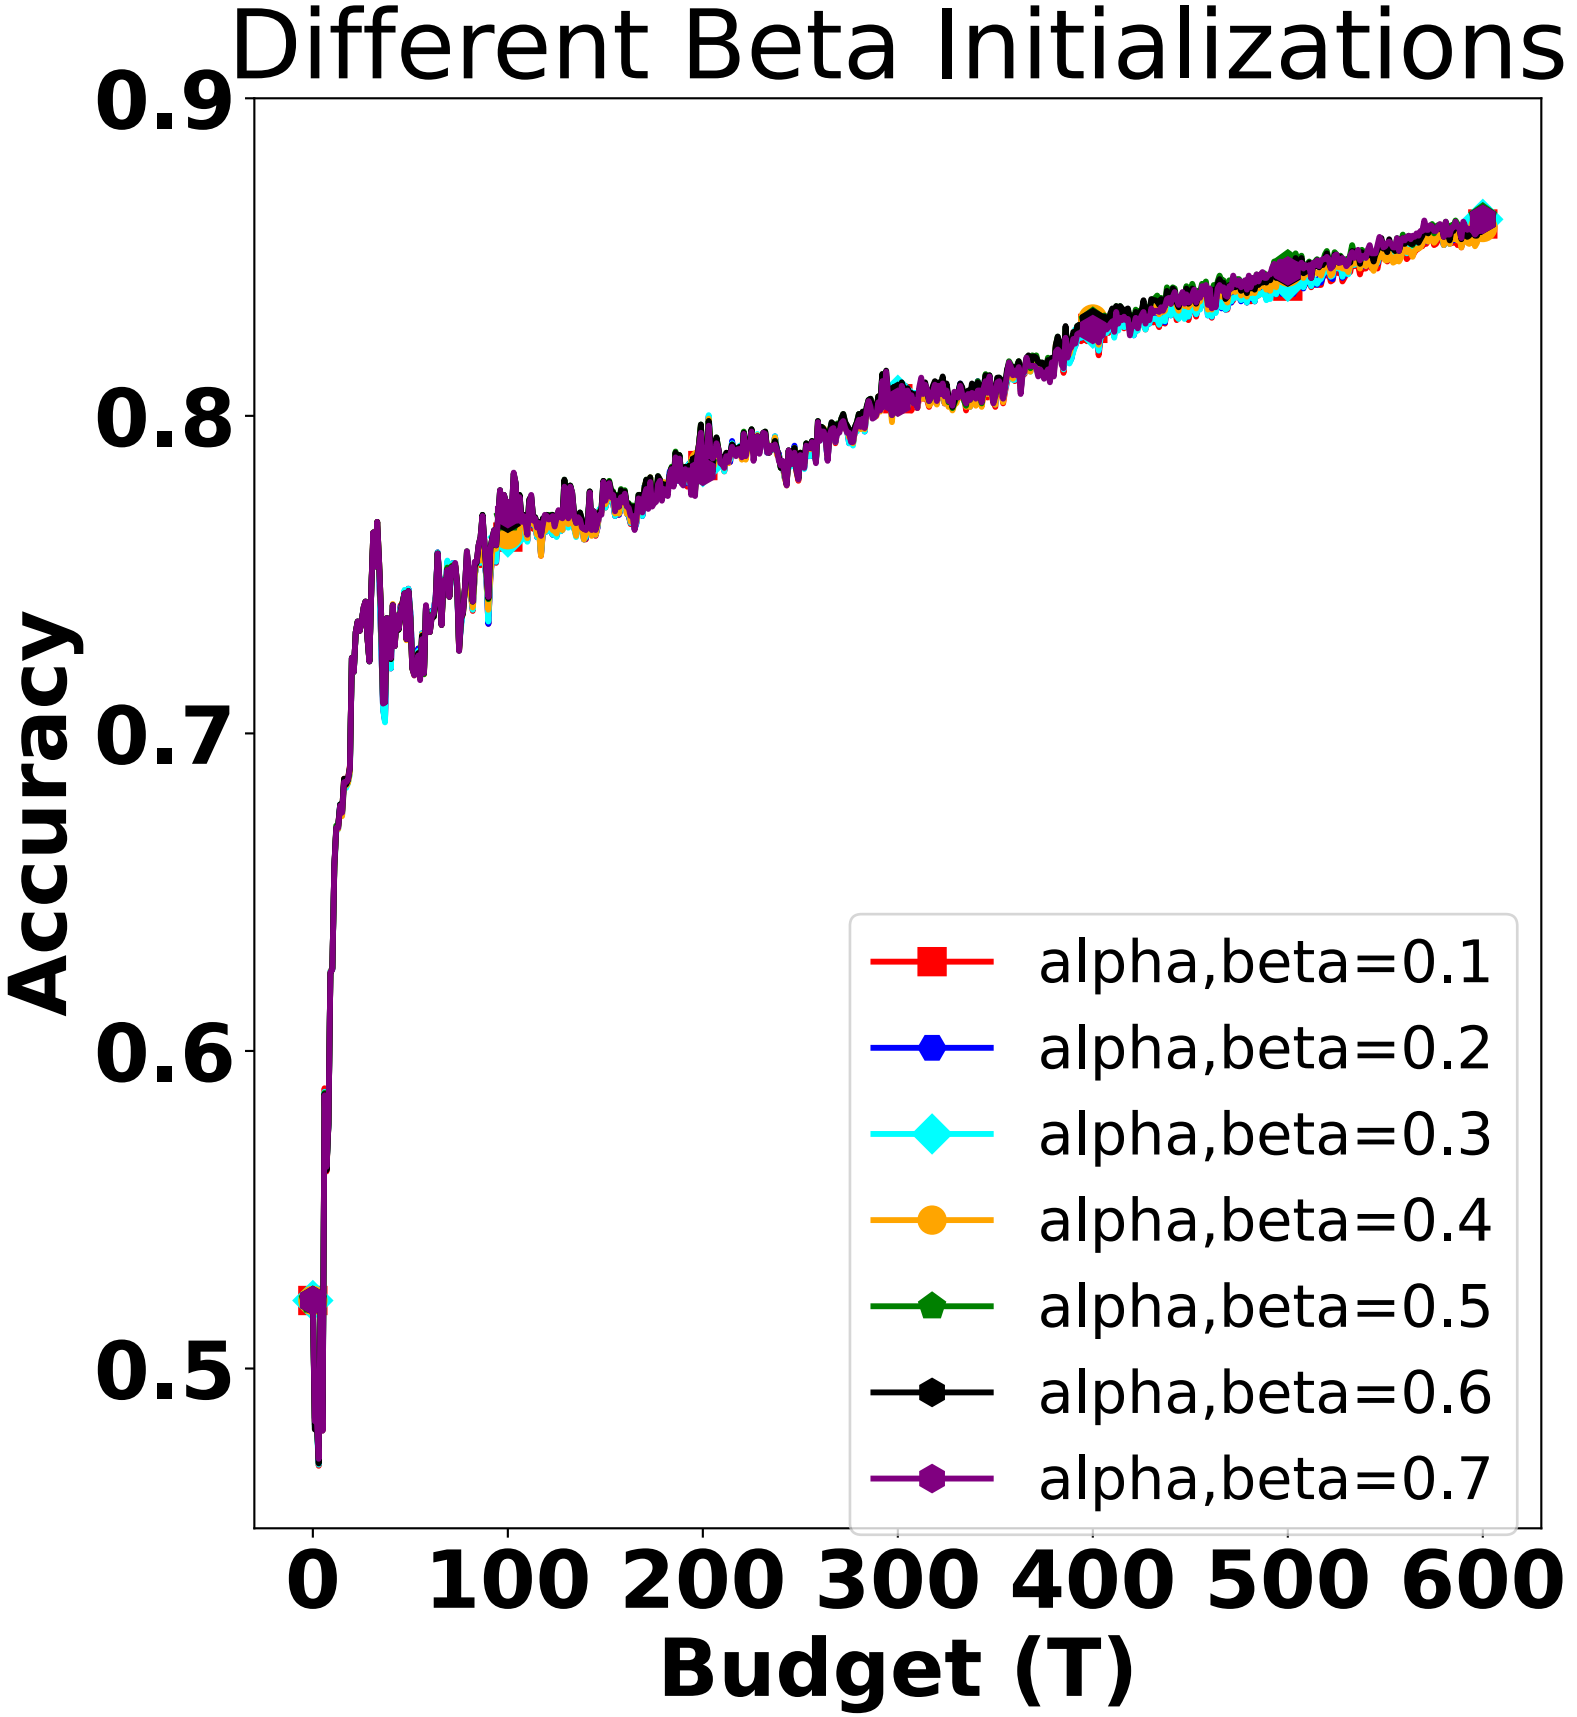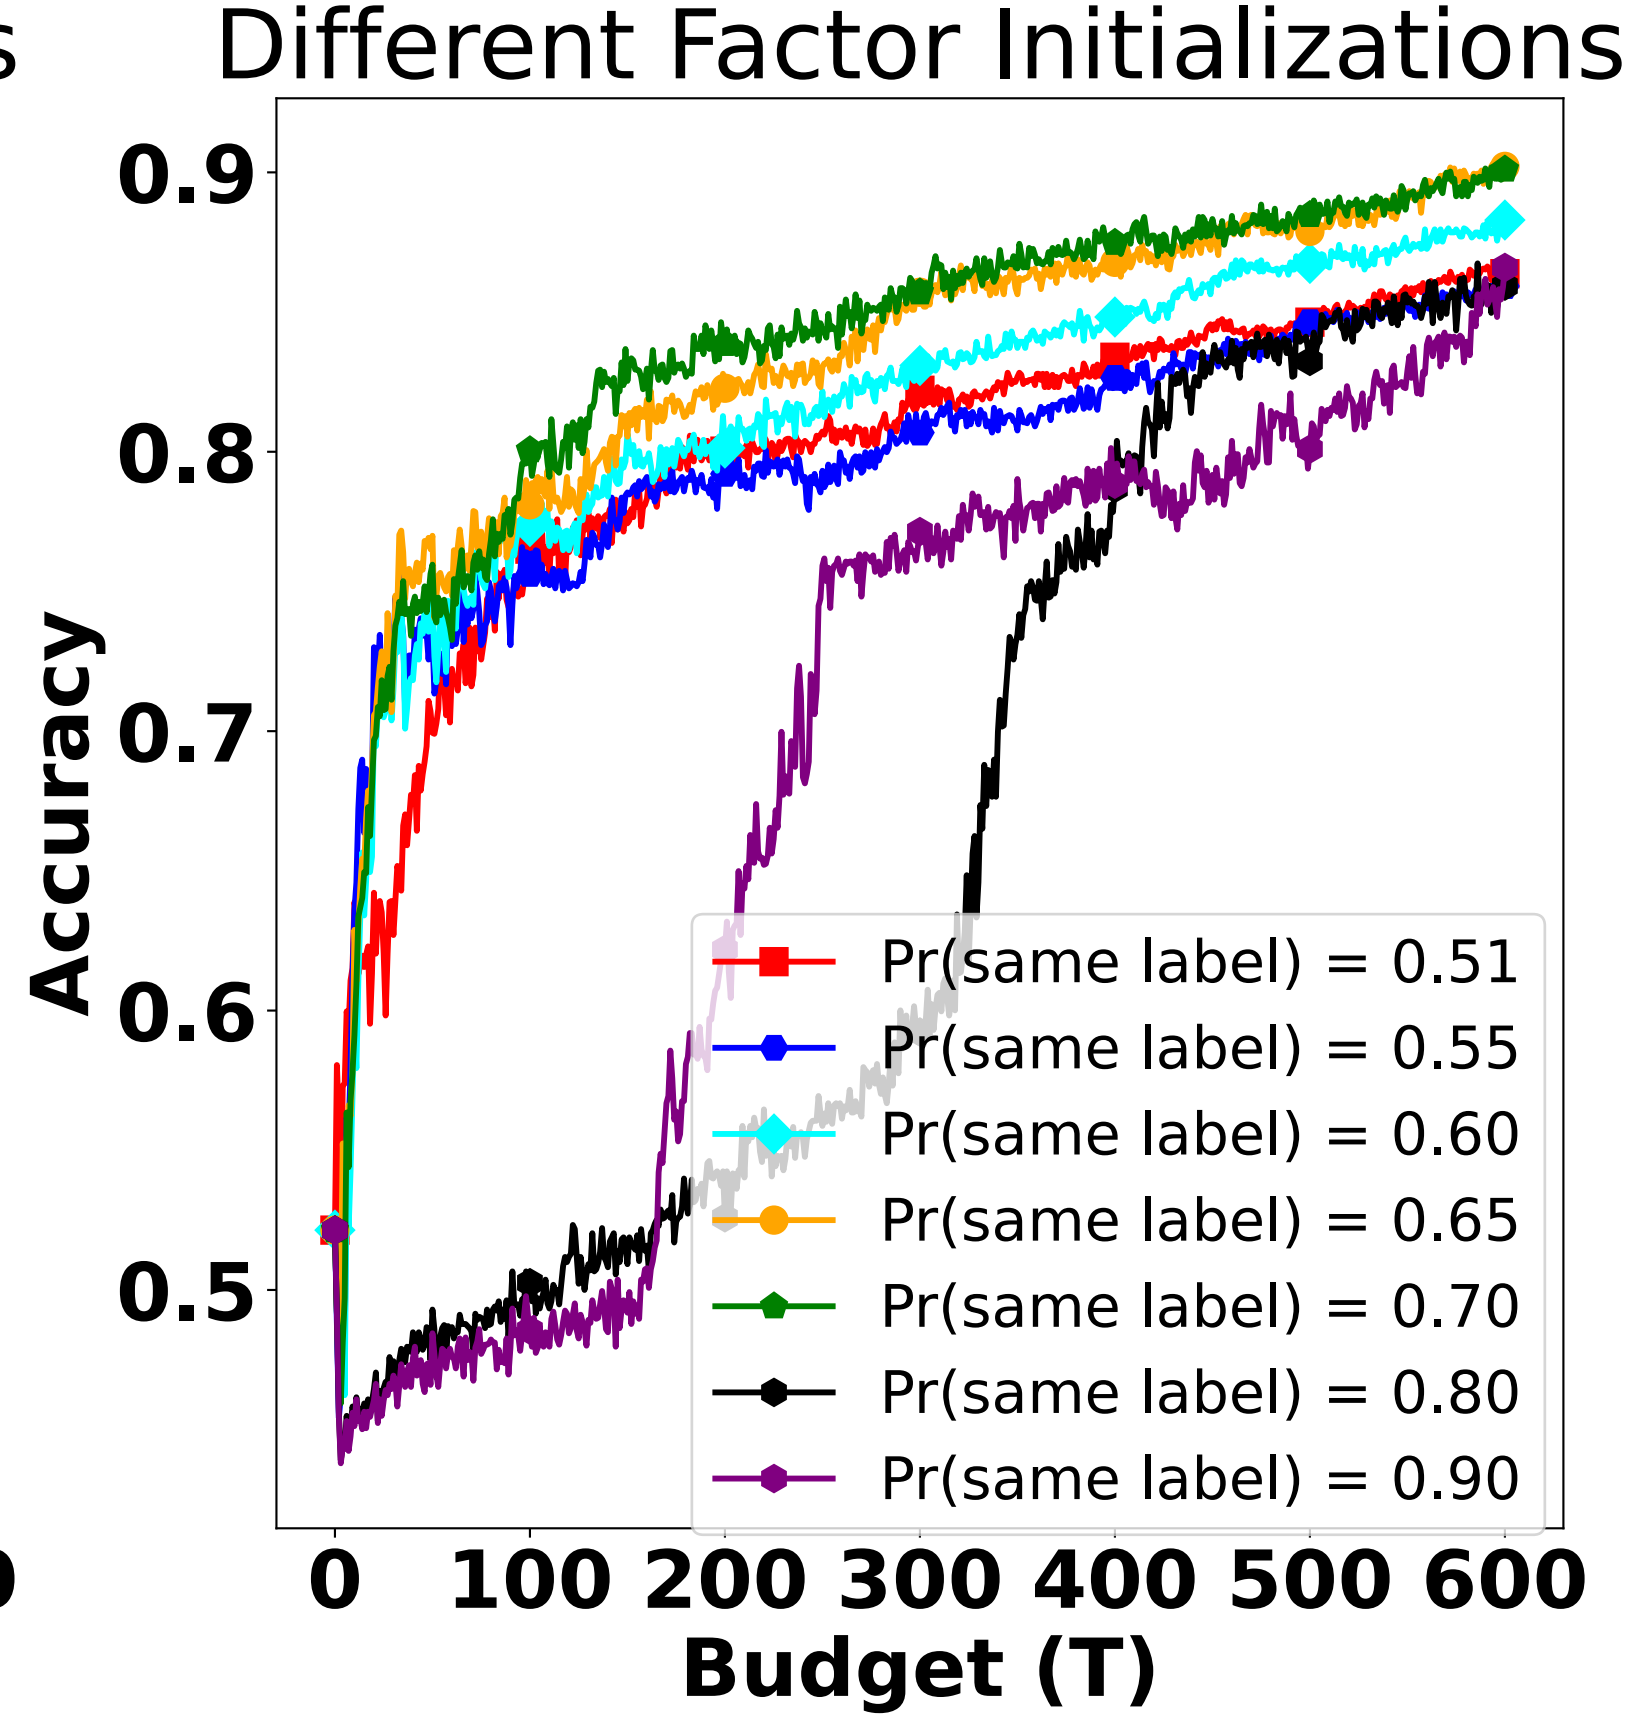

Supplement: supplementary_material [file attachment]

WebKB Train Set

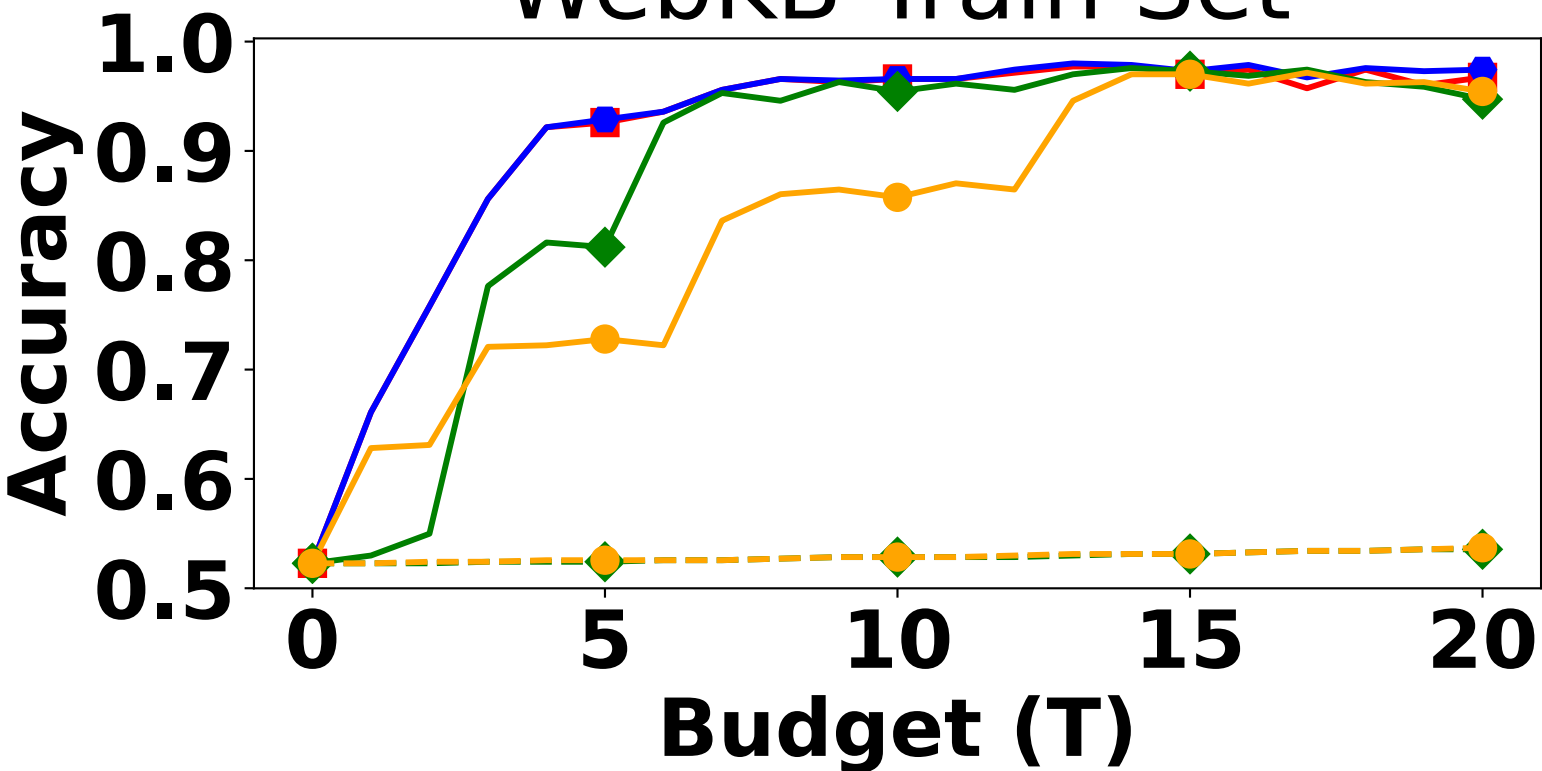

Bitcoin Train Set

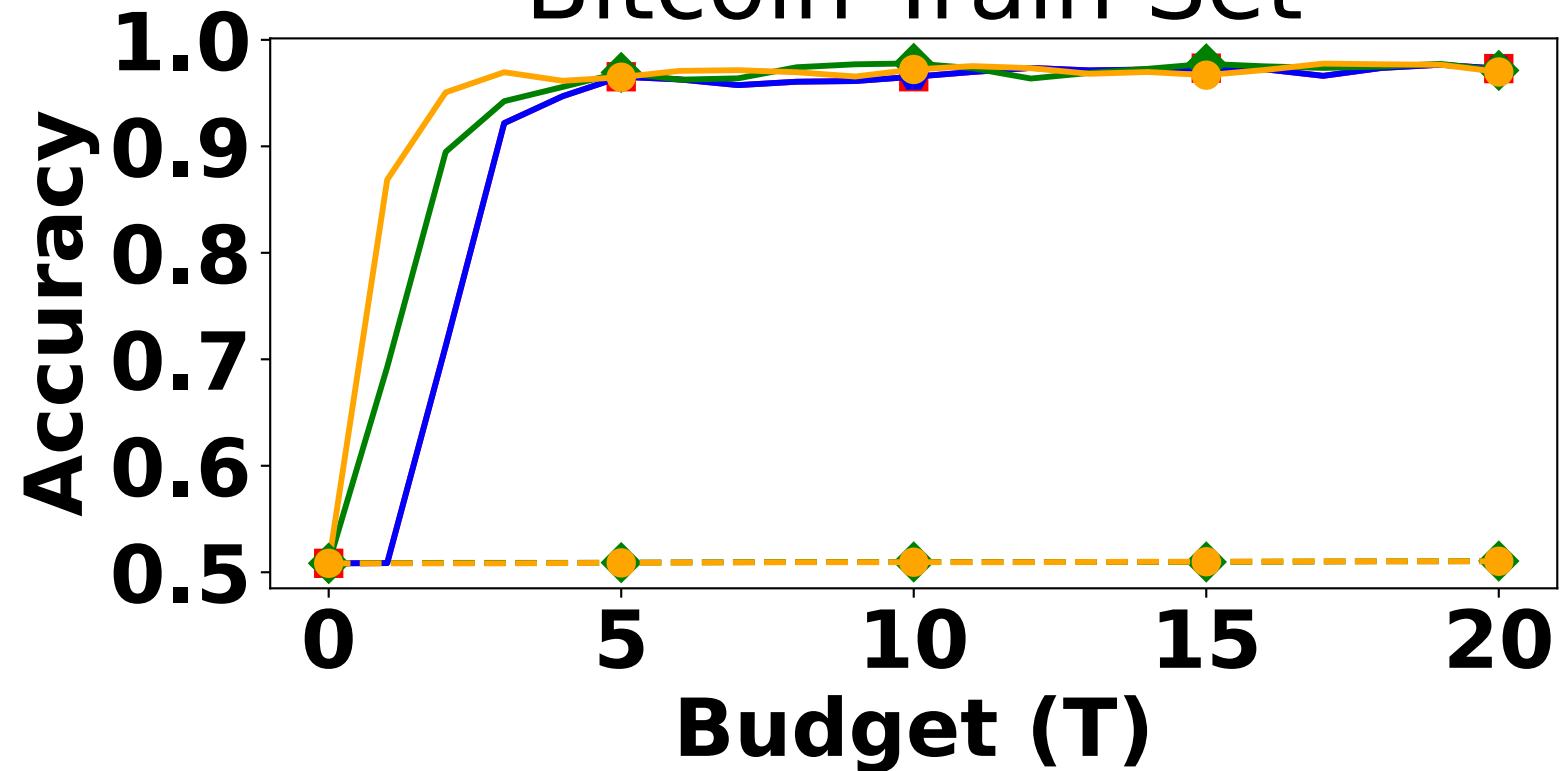

WebKB Test Set

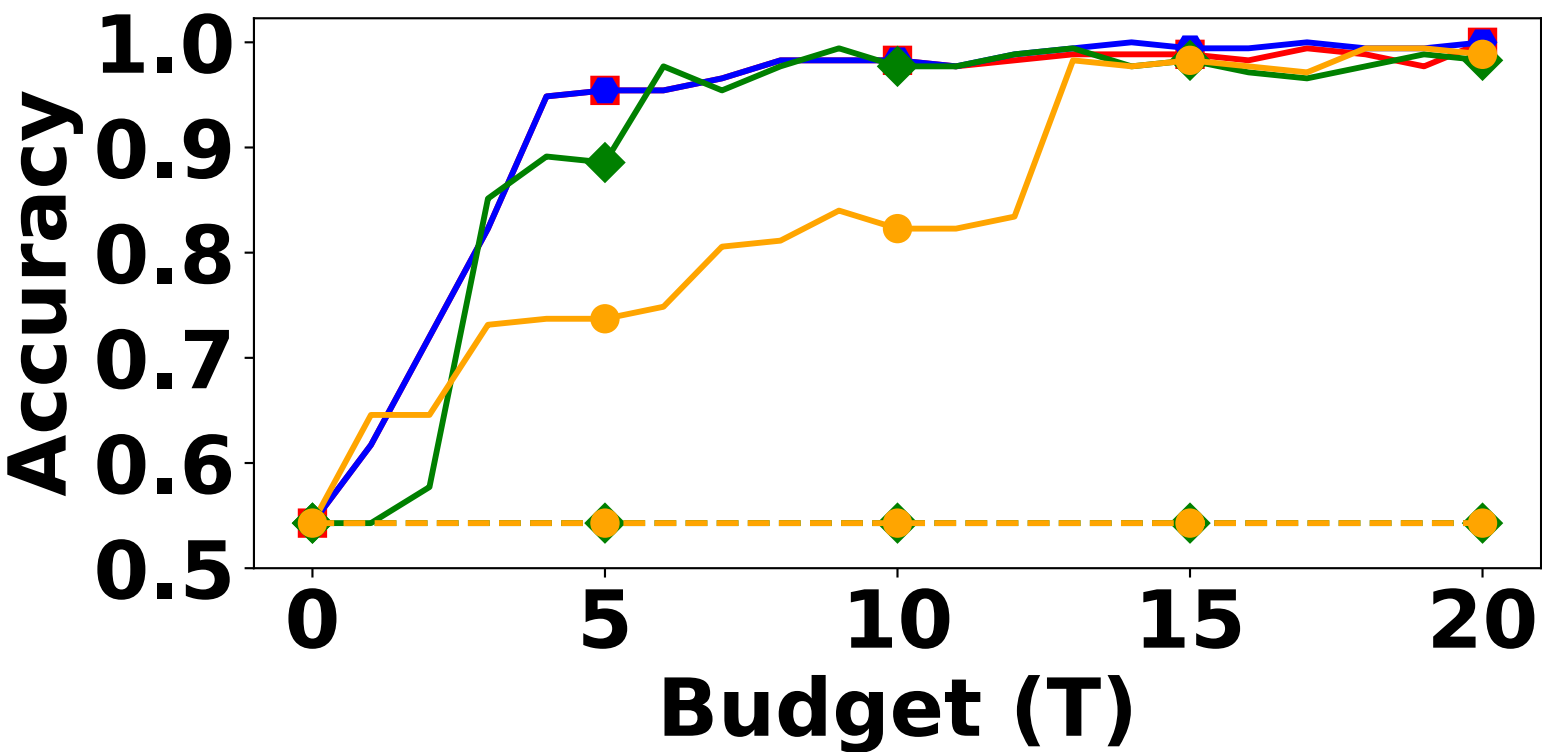

Bitcoin Test Set

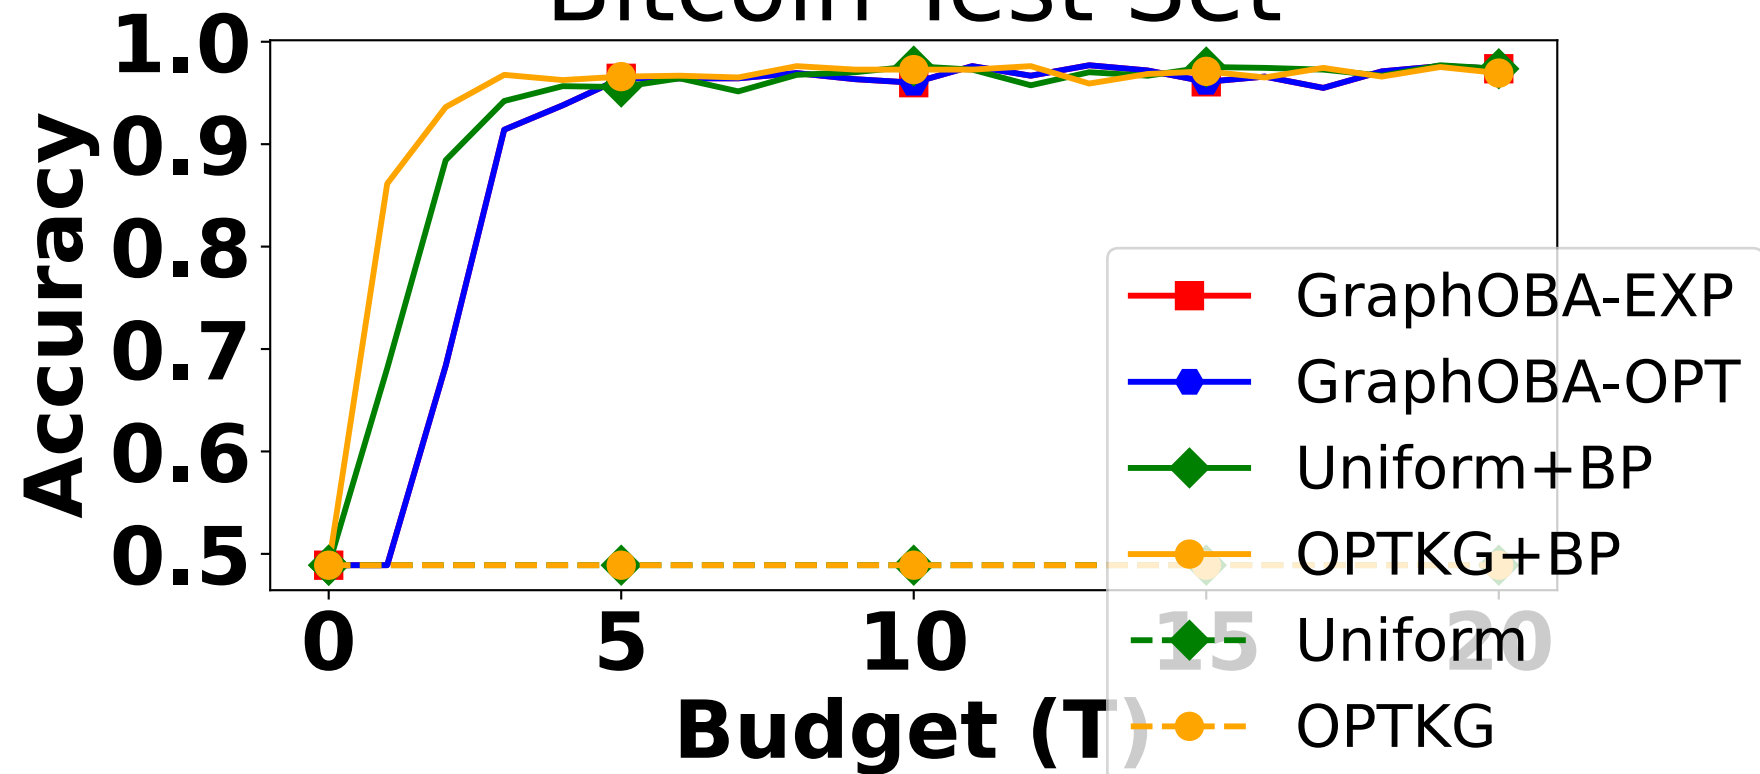

Supplement: supplementary_material [file attachment]

# Different Seed Values

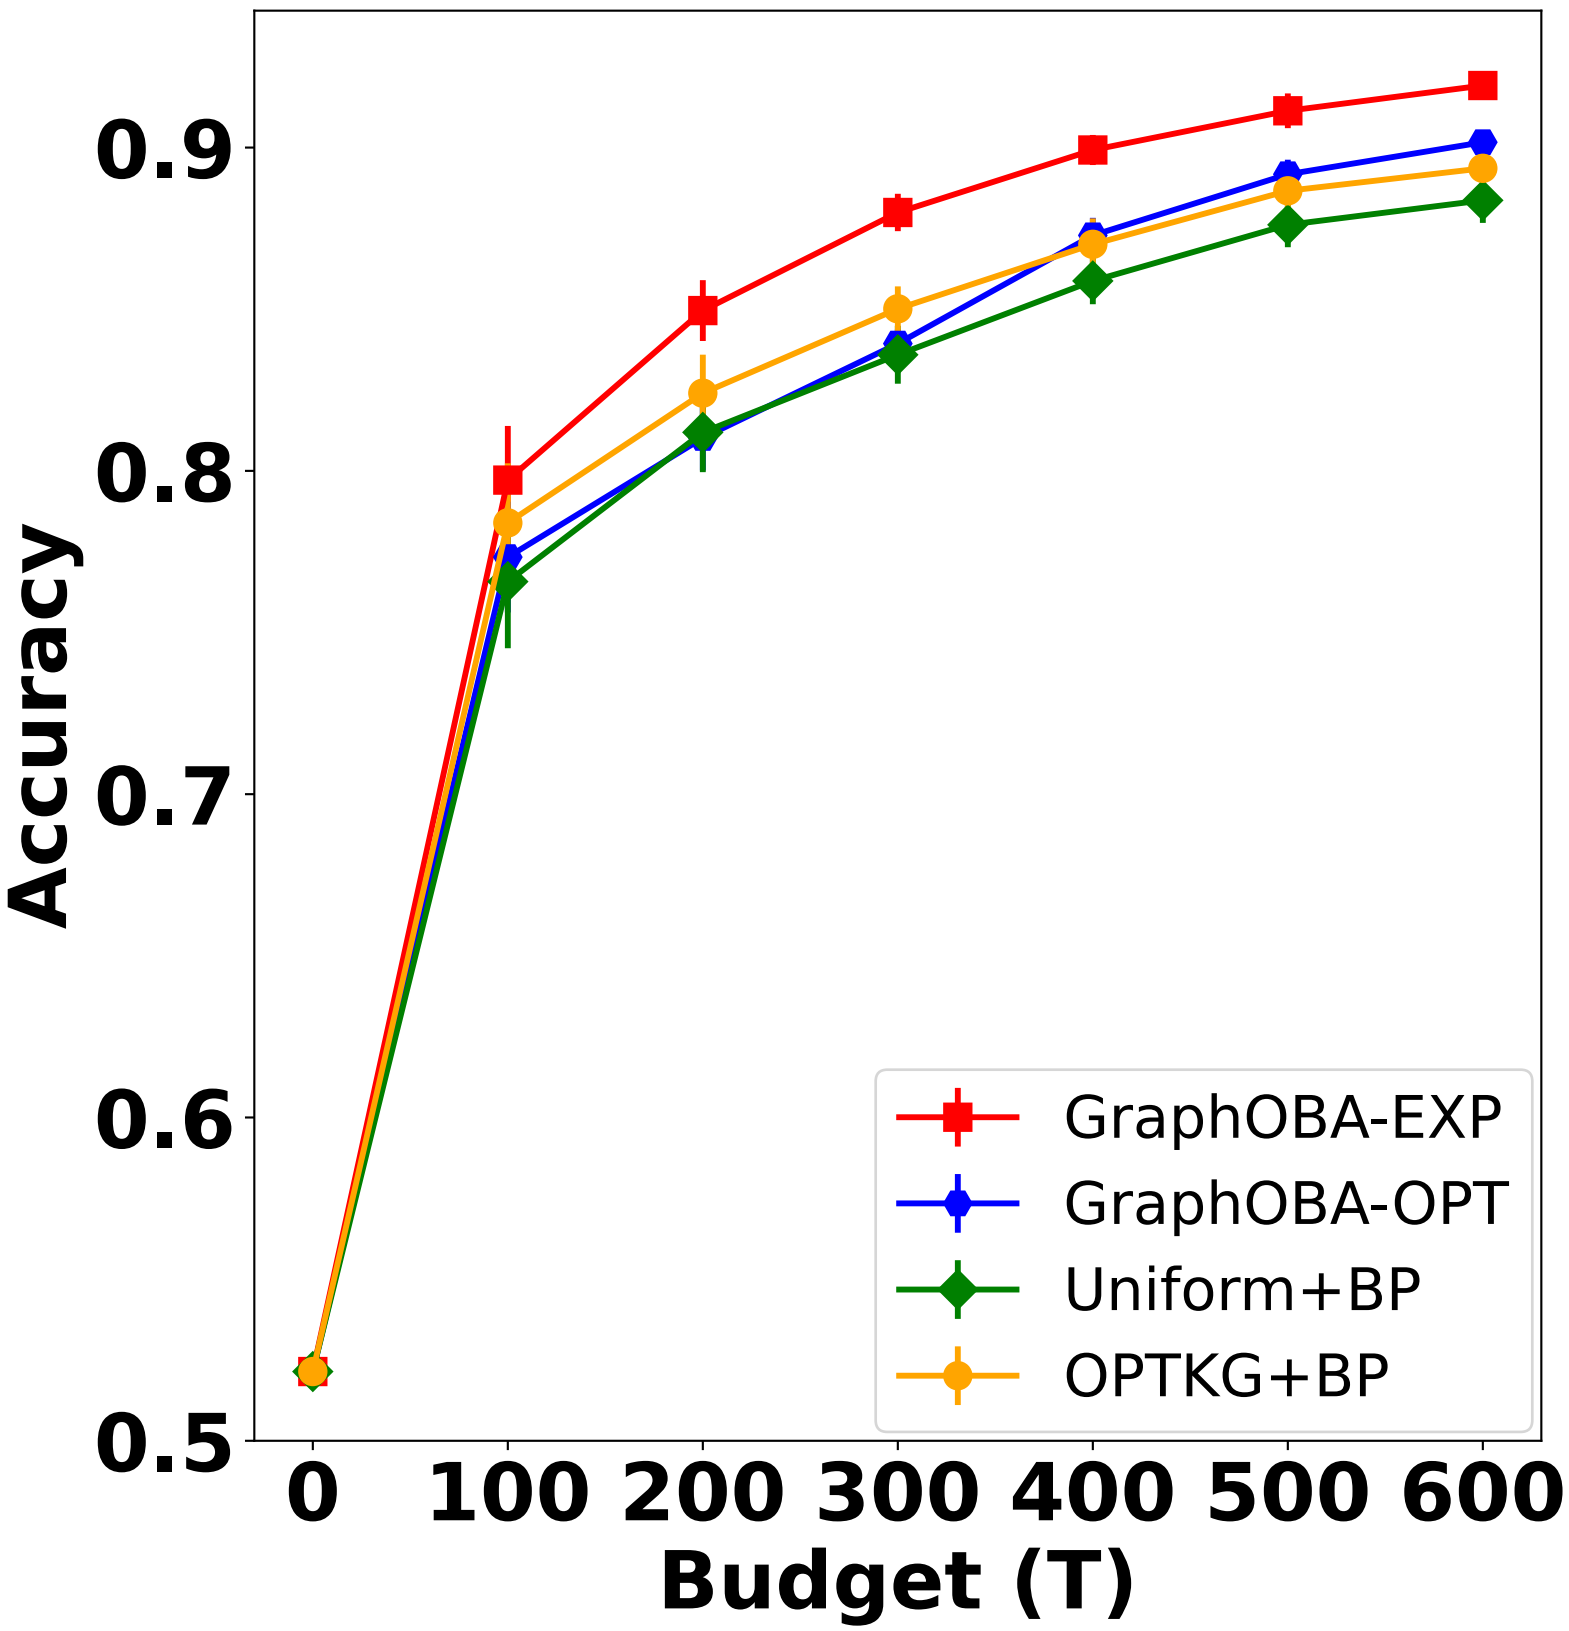

# Different Sample Sizes

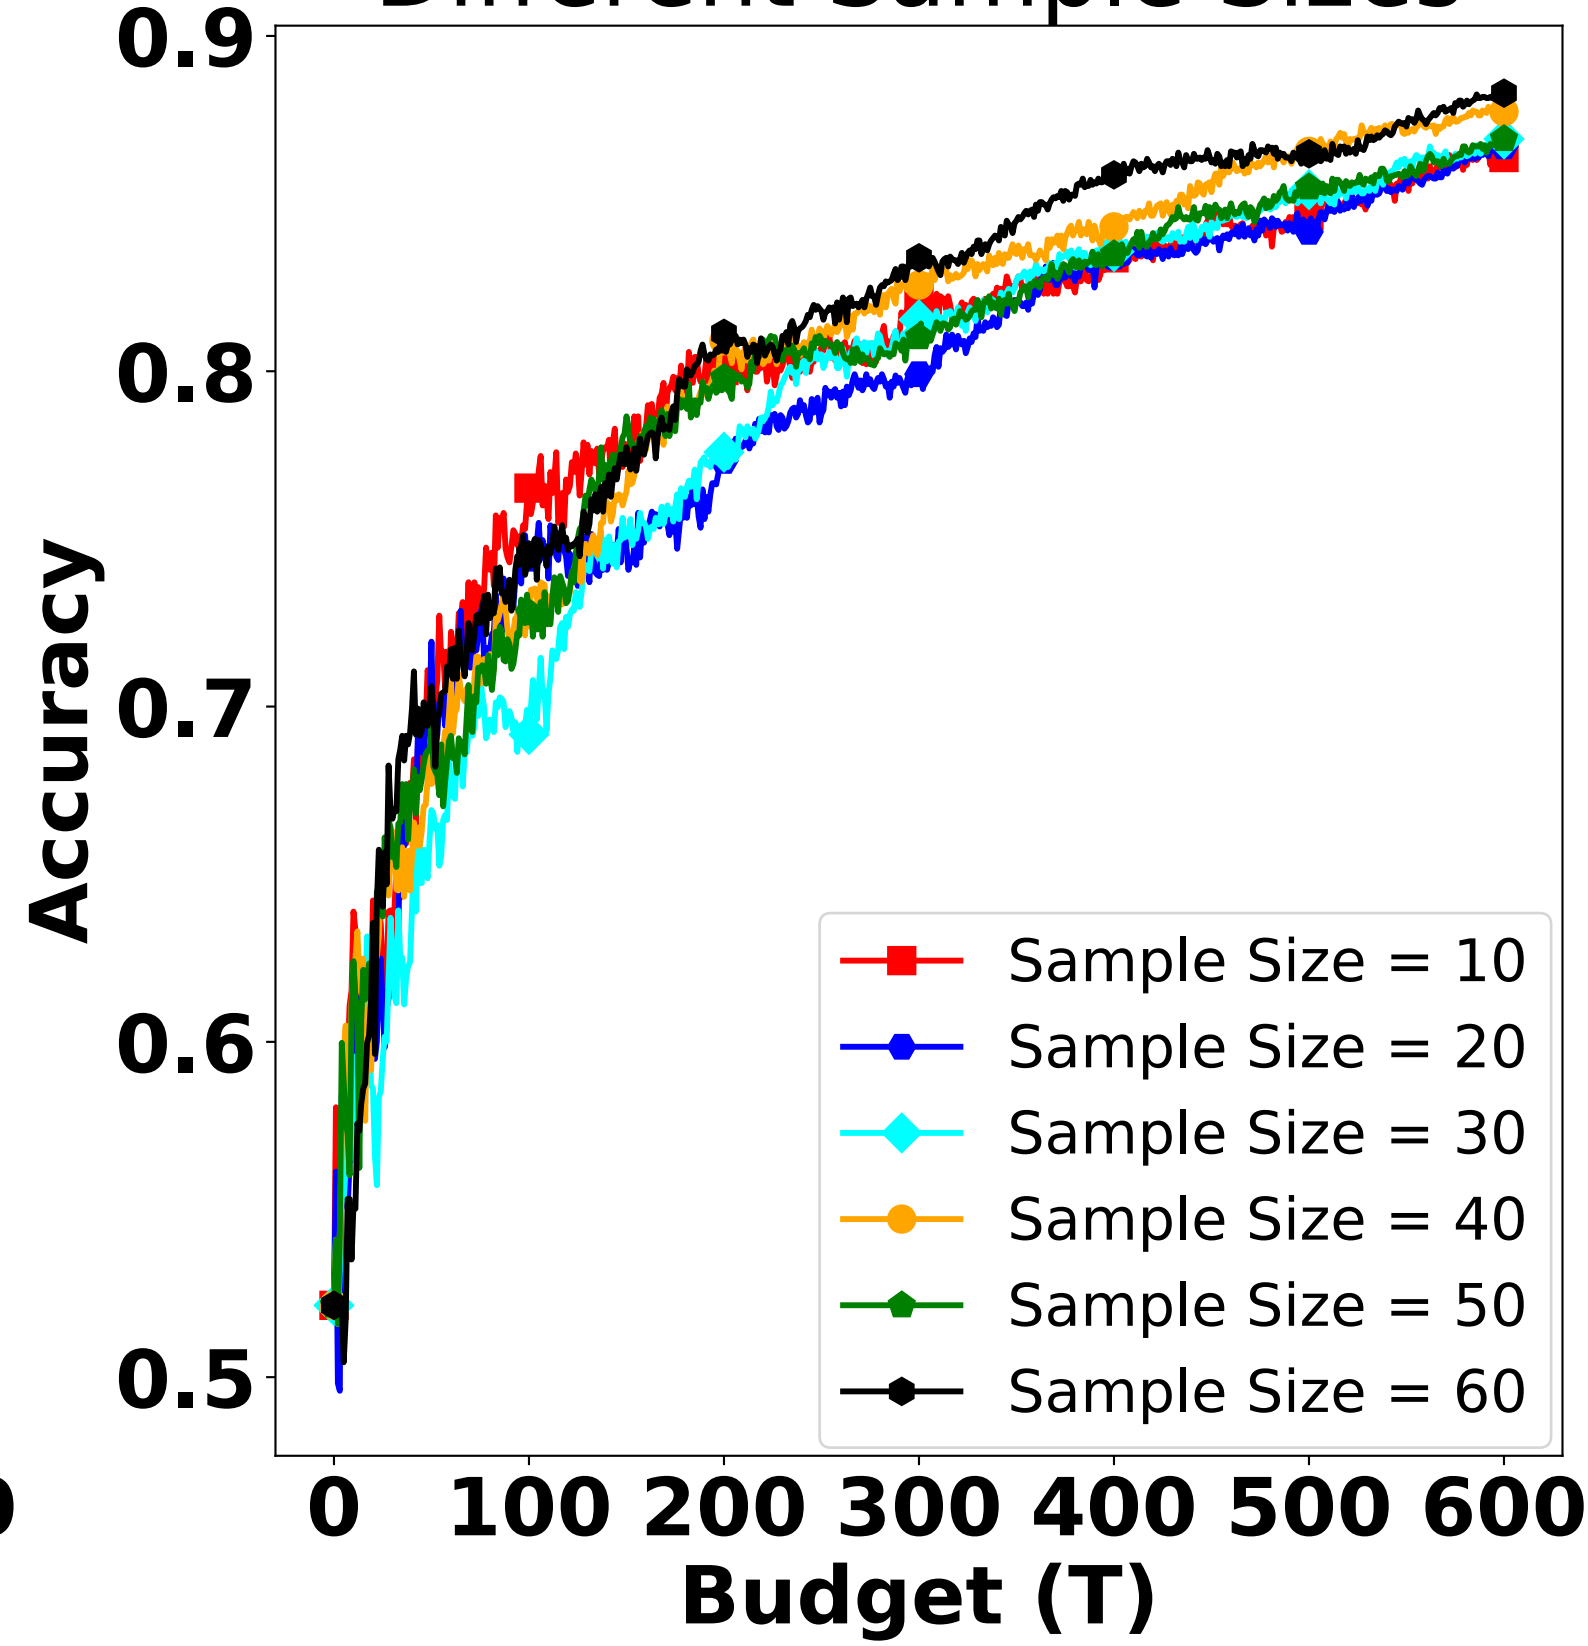

Supplement: supplementary_material [file attachment]

WebKB

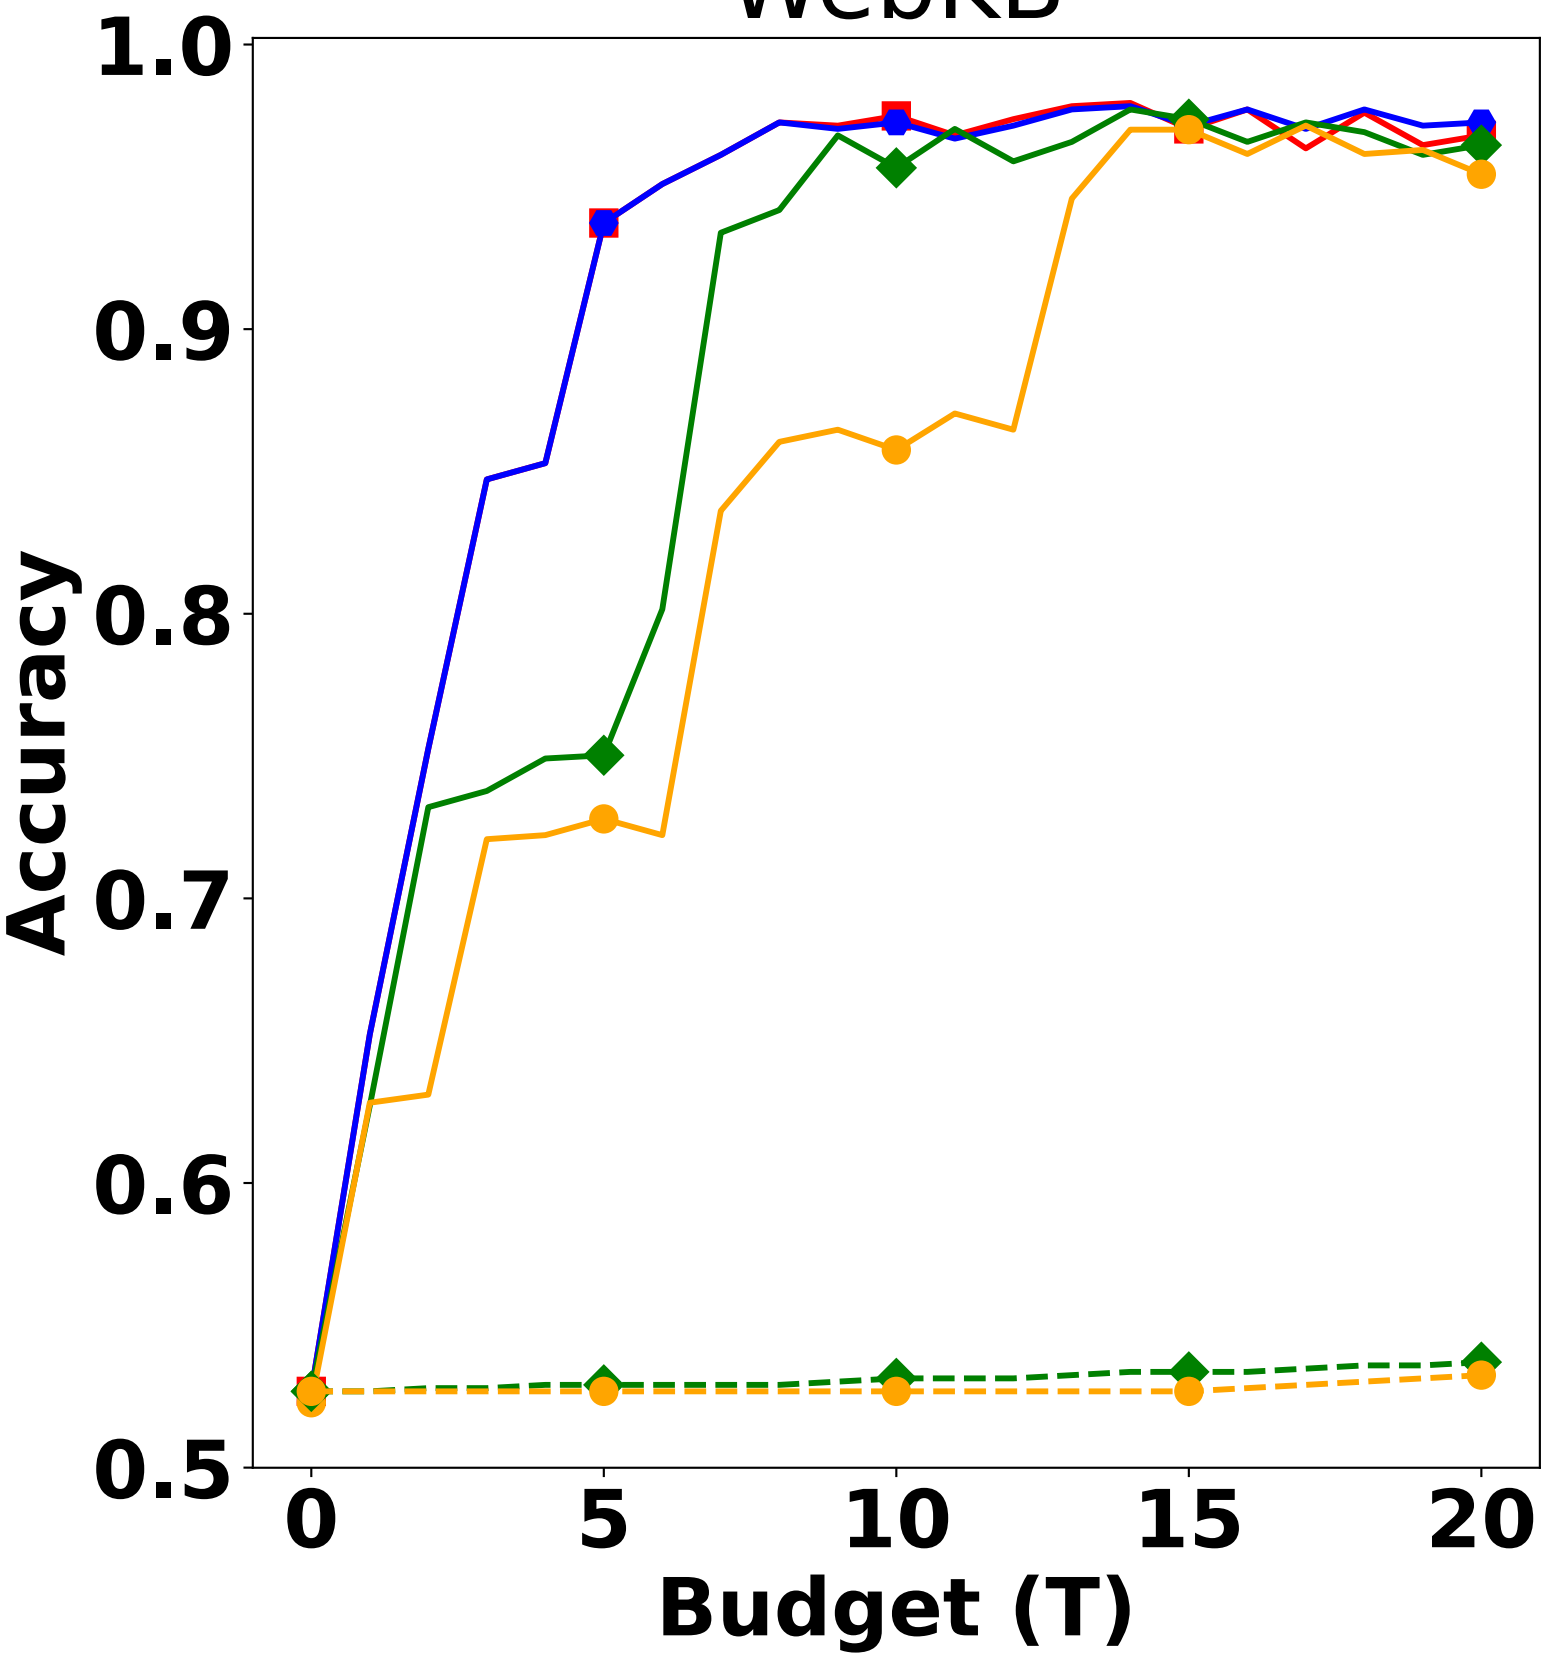

Bitcoin

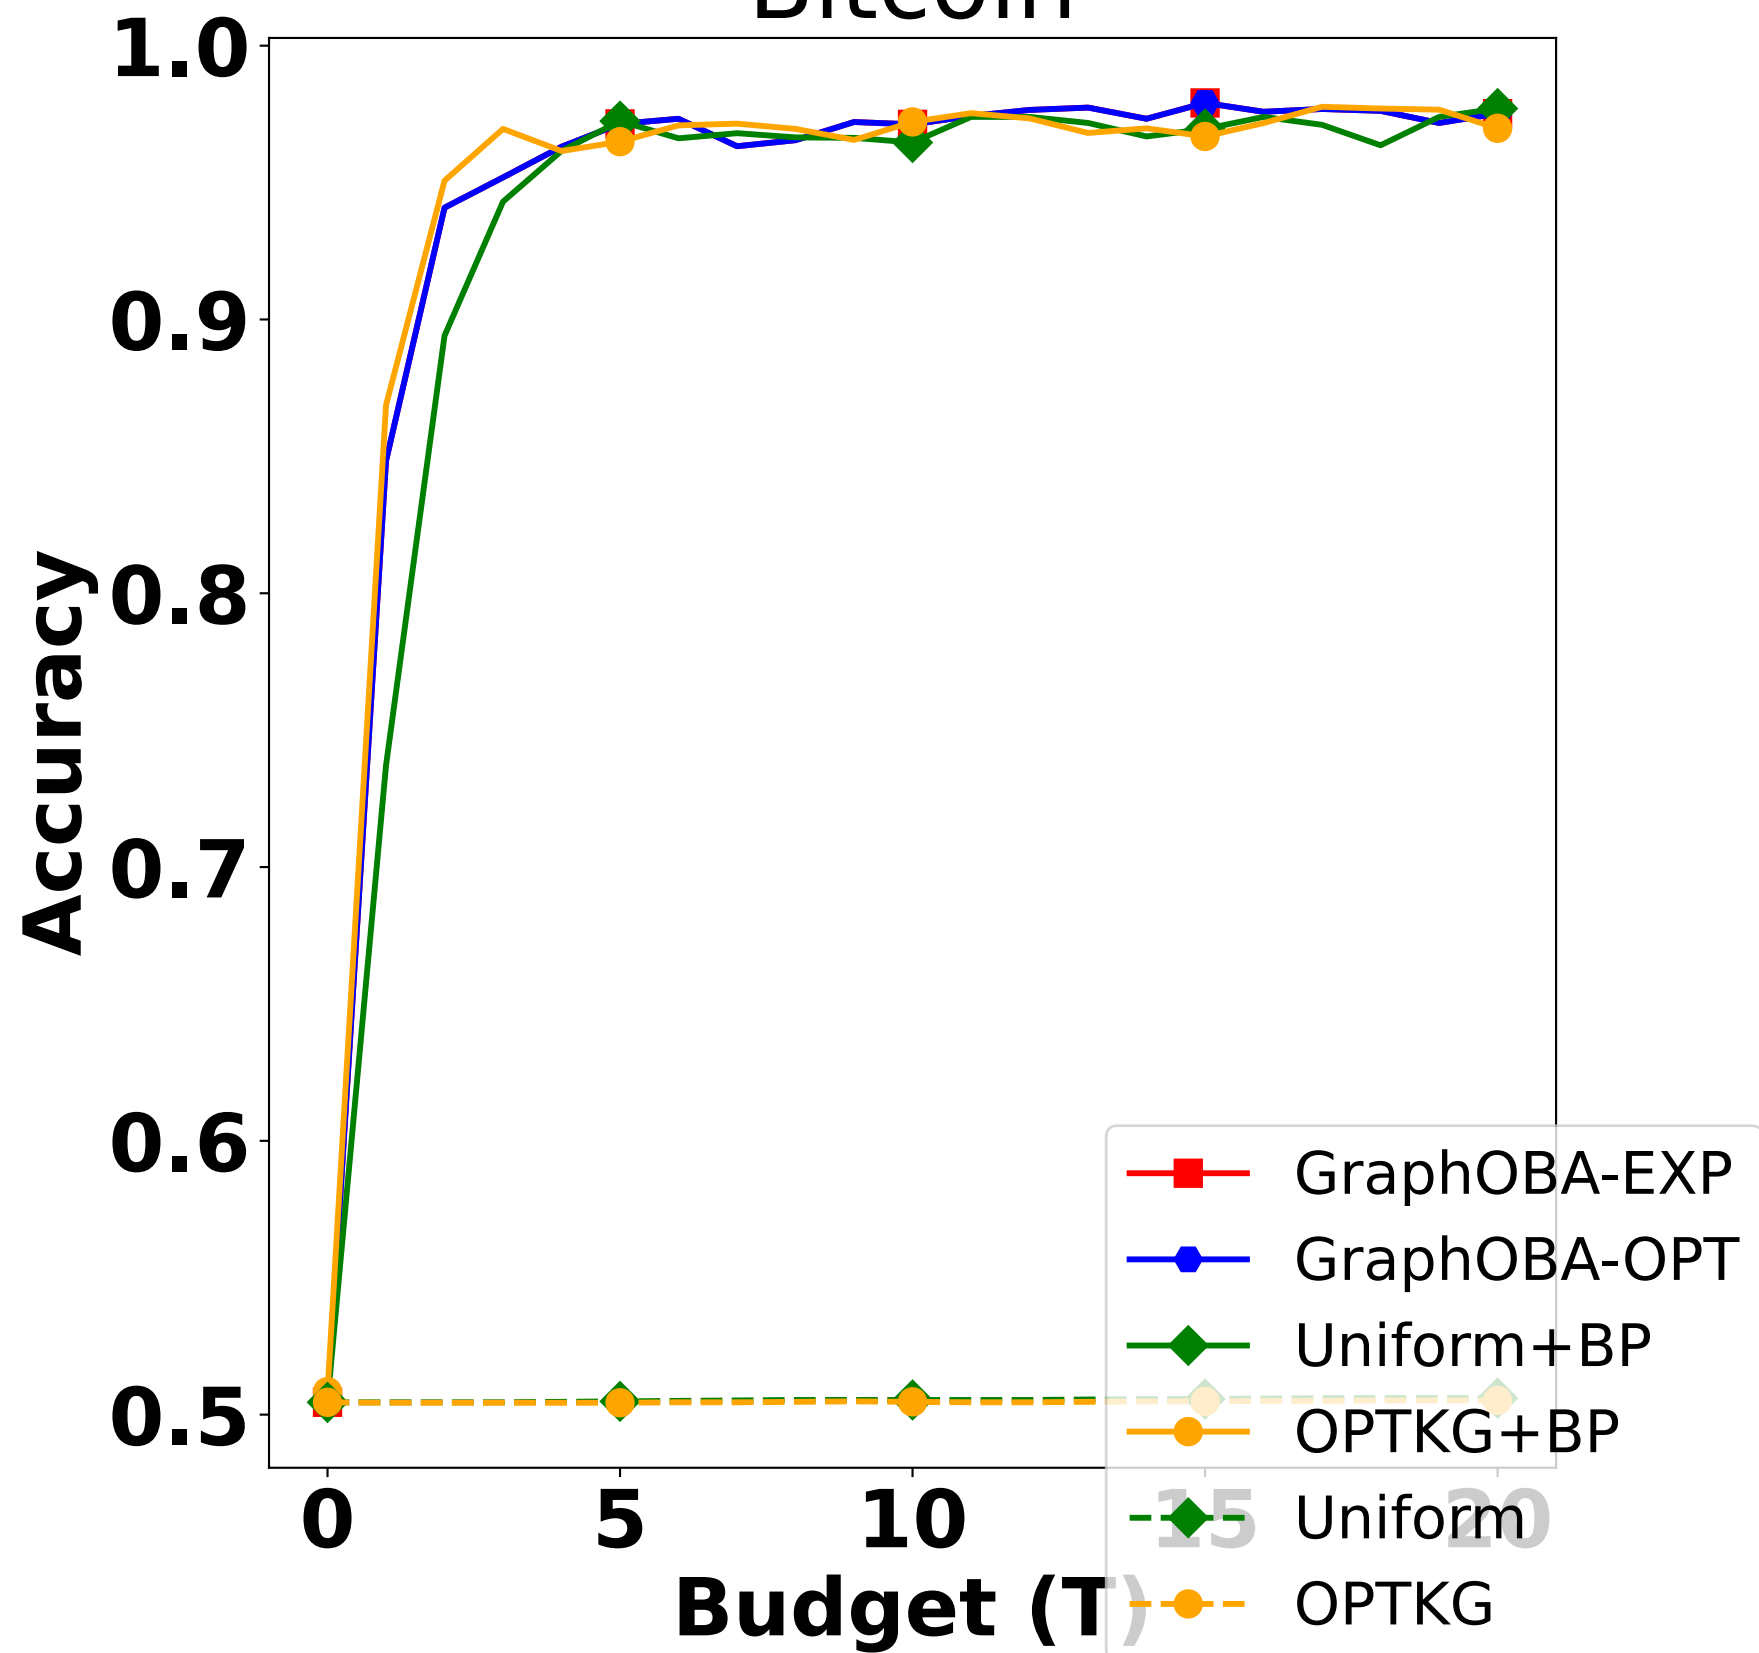

Supplement: supplementary_material [file attachment]

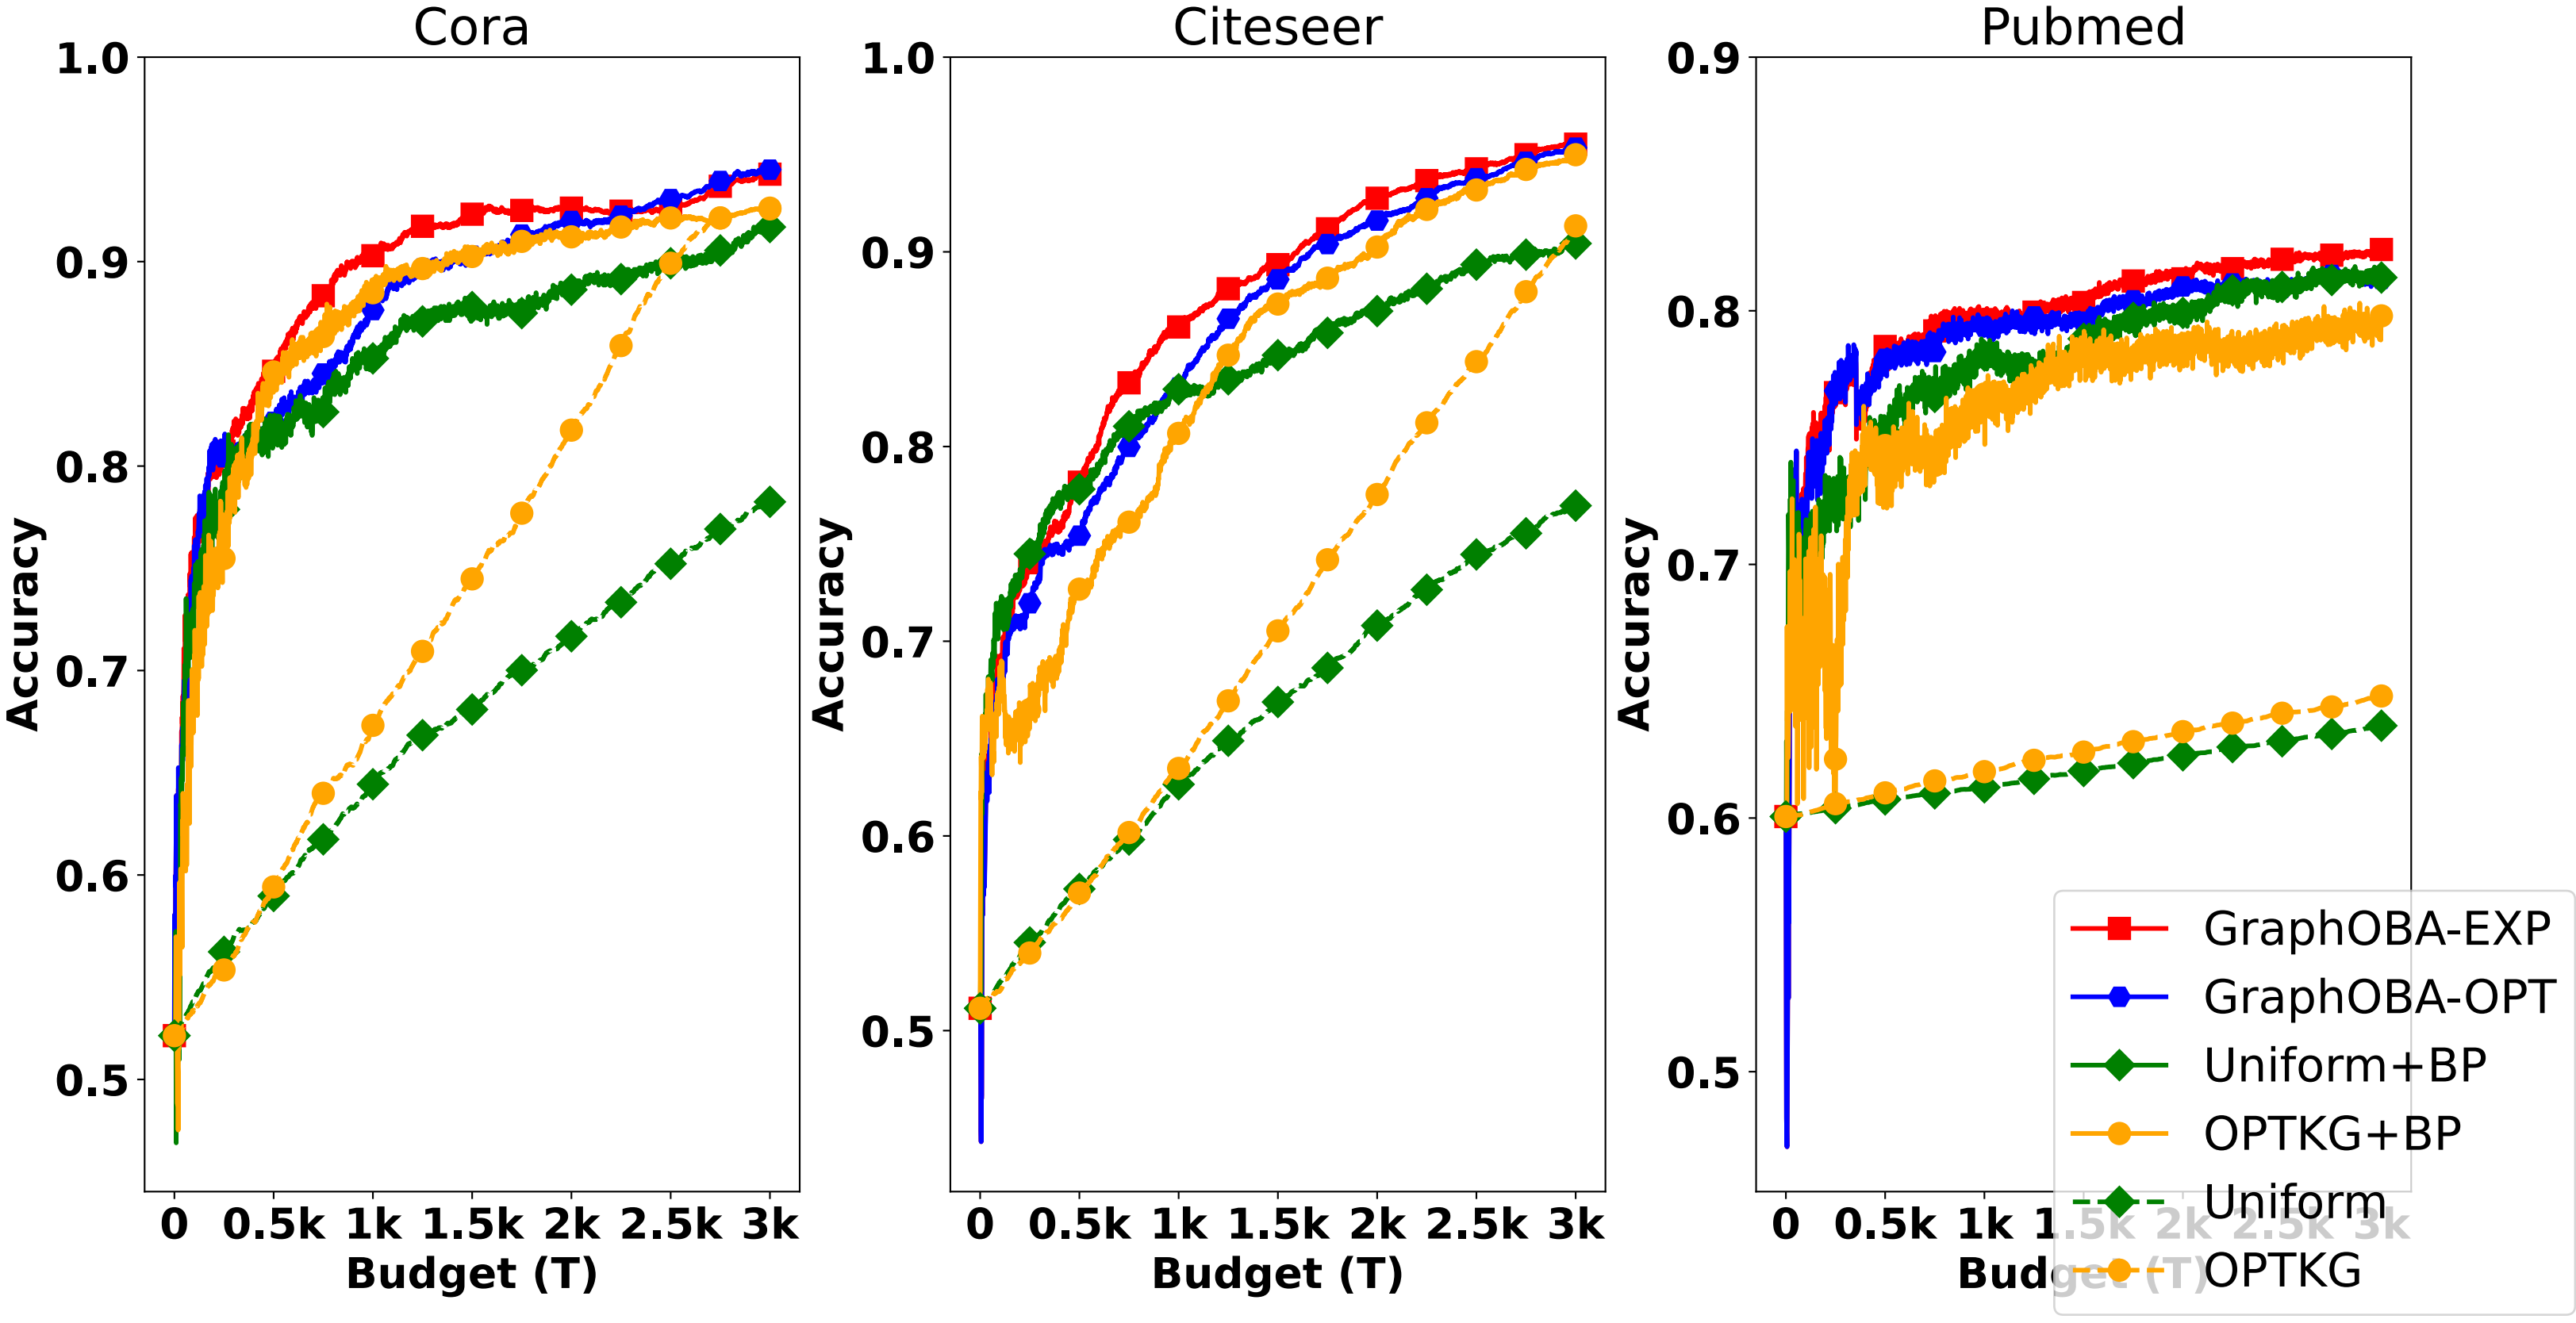

Supplement: supplementary_material [file attachment]
